# Supplementary material for: The Molecular Basis for Remyelination Failure in Multiple Sclerosis
Source: PubMed Central journal article supplement (PMC6721708; doi:10.3390/cells8080825), 2019-08-03
Supplement: cells-08-00825-s001.pdf [file cells-08-00825-s001.pdf]

| Cell type                               | Molecule                                                                              | Potential impact on remyelination                                                                                                                                                                                    |
|-----------------------------------------|---------------------------------------------------------------------------------------|----------------------------------------------------------------------------------------------------------------------------------------------------------------------------------------------------------------------|
| Oligodendroglial Precursor Cells (OPCs) | Myelin-associated neurite outgrowth inhibitor NogoA                                   | Impairing remyelination<br>Impeding neurite outgrowth<br>Enhanced remyelination by anti-NogoA-Ab ozanezumab                                                                                                          |
|                                         | Membrane-bound repulsive guidance molecule A (RGMA)                                   | Impairing remyelination<br>Modulates T cell response<br>Impeding neurite outgrowth<br>Enhanced remyelination by anti-RGMA-Ab elezanumab                                                                              |
|                                         | Nogo-receptor interacting protein LINGO-1                                             | Impairing remyelination<br>Impeding OPC differentiation<br>Enhanced remyelination by anti-LINGO-1-Ab opicinumab                                                                                                      |
|                                         | Envelope protein (Env) of the pathogenic human endogenous retrovirus type W (pHERV-W) | Impairing remyelination<br>Impeding OPC differentiation<br>Enhanced remyelination and reduced neurodegeneration by anti-pHERV-W Env-Ab temelimab                                                                     |
|                                         | Simvastatin                                                                           | (Potentially) stimulating OPC differentiation and survival                                                                                                                                                           |
|                                         | Quetiapine                                                                            | Stimulating OPC differentiation and myelin protein production                                                                                                                                                        |
|                                         | Clemastine fumarate                                                                   | Stimulating OPC differentiation and remyelination                                                                                                                                                                    |
| Neural Stem Cells (NSCs)                | Chitinase 3-like-3 (Chi3l3)                                                           | Activating epidermal growth factor receptor (EGFR)<br>Inducing pro-oligodendrogenic transcription factor signature<br>Enhancing oligodendrogenesis                                                                   |
|                                         | Gli1                                                                                  | Impairing remyelination<br>Immobilizing and impeding the differentiation of resident NSCs<br>Enhanced remyelination by GANT61 (SMI of Gli1)                                                                          |
|                                         | Sirt1                                                                                 | Impairing remyelination<br>Suppressing oligodendrogenesis from NSCs<br>Activating downstream Akt and p38 MAPK<br>Limiting the expansion of SVZ NSCs and OPCs<br>Enhanced oligodendrogenesis by EX-527 (SMI of Sirt1) |
|                                         | nuclear factor I X (NFIX)                                                             | Impairing remyelination<br>Suppressing oligodendrogenesis from NSCs                                                                                                                                                  |
|                                         | B-cell leukemia homeodomain 1 (Pbx1)                                                  | Early regulator of SVZ neuro- und oligodendrogenesis<br>Priming factor to activate neuron-specific genes Dcx and Th                                                                                                  |
|                                         | prospero-related homeobox 1 gene (Prox1)                                              | Enhancing SGZ neurogenesis and neuronal differentiation<br>Downstream target of $\beta$ -catenin-TCF/LEF signaling                                                                                                   |
|                                         | drosha and nuclear factor IB (NFIB)                                                   | Enhancing oligodendrogenesis<br>Drosha enhances SGZ neurogenesis and suppresses oligodendrogenesis via suppression of NFIB                                                                                           |
|                                         | nuclear factor-erythroid 2-related factor 2 (NRF2)                                    | Enhancing SGZ neurogenesis<br>Enhancing neuronal differentiation<br>Regulating the expression of several antioxidant enzymes                                                                                         |
|                                         | fibroblast growth factor receptor-3 (FGFR3)                                           | Promoting remyelination<br>Enhancing SVZ oligodendrogenesis<br>Promoting migration of SVZ-derived OPCs to more distal areas                                                                                          |
| Microglia and peripherally-derived      | Fractalkine receptor (CX3CR1)                                                         | Promoting remyelination<br>Increasing microglial phagocytic capacity<br>Improving extracellular myelin debris clearance                                                                                              |
|                                         | Triggering receptor expressed on myeloid cells (TREM2)                                | Promoting remyelination<br>Increasing microglial phagocytic capacity<br>Improving extracellular myelin debris clearance                                                                                              |

|                                                                                       |                                                                                                                                                  |
|---------------------------------------------------------------------------------------|--------------------------------------------------------------------------------------------------------------------------------------------------|
| TAM family receptors MerTK and Axl                                                    | Promoting remyelination<br>Activating microglia and increasing microglial phagocytic capacity<br>Improving extracellular myelin debris clearance |
| Envelope protein (Env) of the pathogenic human endogenous retrovirus type W (pHERV-W) | Impairing remyelination<br>Stimulating microglia-associated inflammation and neurodegeneration<br>Decreasing microglial phagocytic capacity      |
| Matrix metalloproteinase 7 (MMP7)                                                     | Promoting remyelination<br>Splitting fibronectin aggregates that disrupt OPC differentiation<br>Secreted by microglia                            |
| Long noncoding RNA (lncRNA) GAS5                                                      | Impairing remyelination<br>Averting microglial M2 polarization by suppressing TRF4                                                               |
| CXCL12                                                                                | Promoting OPC differentiation<br>Secreted by microglia                                                                                           |
| Semaphorin 3F                                                                         | Promoting OPC differentiation<br>Improving OPC recruitment<br>Secreted by microglia                                                              |
| Activin-A                                                                             | Promoting OPC differentiation<br>Downstream activation of Rac-Cdc42 GTPases, Akt and mTOR<br>Secreted by microglia                               |
| Galectin-3                                                                            | Promoting OPC differentiation<br>Improving myelin integrity and function<br>Secreted by microglia                                                |

**Table S1. Molecules and their potential impact on remyelination in the central nervous system (CNS).** Ab=antibody; SMI=small molecule inhibitor; SVZ=subventricular zone; SGZ=subgranular zone; MAPK=Mitogen-activated protein kinases; TAM= TYRO3, Axl and MerTK family of receptor tyrosine kinases (RTKs).
